# Supplementary material for: Job satisfaction of female radiological technologists: Factor analysis using Quantification Theory Type II
Source: Research Square preprint supplement (doi:10.21203/rs.3.rs-289624/v1), 2021-03-17
Supplement: Supplementary file 1 [file 71a1d391254074d85f9d95d0.docx]

Table 1. Partial correlation coefficient of each question item

| **Question item** | **Partial correlation coefficient** |
| --- | --- |
| Years of working experience | 0. 382 |
| The duty number of times | 0. 381 |
| The number of radiological technologist | 0. 353 |
| Male-female divide | 0. 259 |
| The change of job number of times | 0. 244 |
| Sexual harassment | 0. 223 |
| Overtime work | 0. 219 |
| Digestibility of the paid vacation | 0. 195 |

　
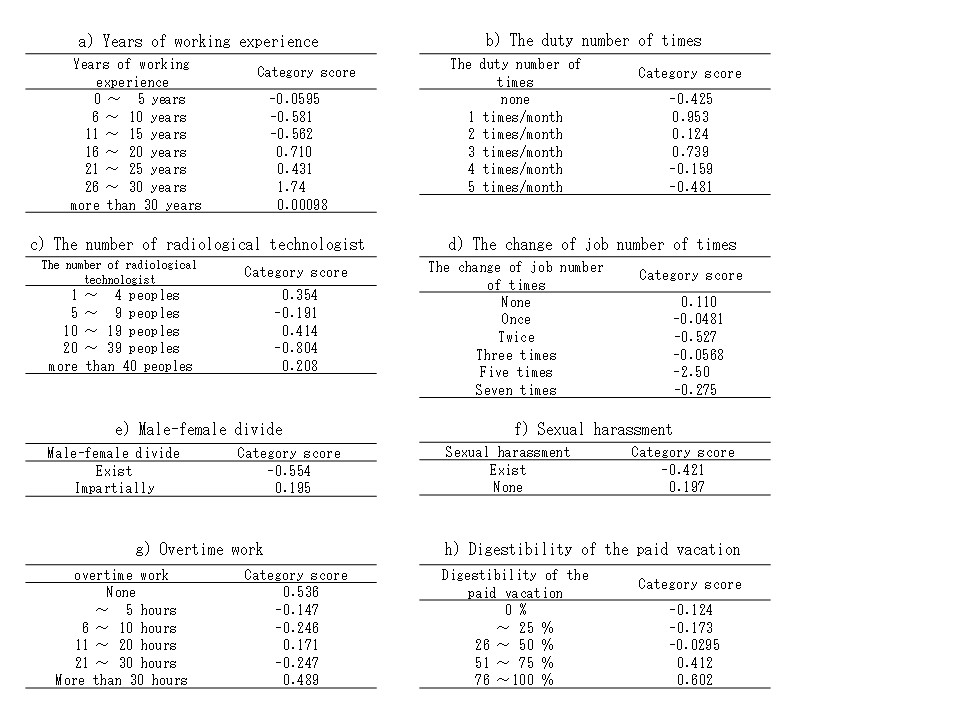
　Table 2. Degree of the influence between job satisfaction and question items
